# Supplementary material for: Natural History of Insulin Sensitivity and Insulin Secretion in the Progression From Normal Glucose Tolerance to Impaired Fasting Glycemia and Impaired Glucose Tolerance: The Inter99 Study
Source: Oxford University Press journal article supplement (doi:10.2337/dc08-1195), 2008-12-04
Supplement: dc08-1195_onlineappendix.doc [file dc08-1195_onlineappendix.doc]

**Table A1. Estimates of insulin sensitivity index (ISI), homeostasis model assessment of insulin sensitivity (HOMA-IS), early-phase insulin release (EPIR), and disposition index (DI) in individuals with normal glucose tolerance (NGT), isolated impaired fasting glycemia (i-IFG), isolated impaired glucose tolerance (i-IGT), and combined IFG/IGT at baseline in the Inter99 study (n=6,006).**

|  | **NGT**  **(*n* = 4,735)** | **i-IFG**  **(*n* = 520)** | **i-IGT**  **(*n* = 532)** | **IFG/IGT**  **(n = 219)** | ***P*** |
| --- | --- | --- | --- | --- | --- |
| ISI | 2.58 (2.09;3.25) | 2.10 (1.72;2.70) | 1.44 (1.25;1.72) | 1.33 (1.14;1.51) | a,b,c,d,e,f |
| HOMA-IS | 0.95 (0.65;1.39) | 0.58 (0.39;0.81) | 0.73 (0.43;1.13) | 0.45 (0.32;0.63) | a,b,c,d,e,f |
| EPIR | 757 (557;992) | 549 (308;838) | 625 (386;964) | 541 (290;832) | a,c,d,e,f |
| DI | 2,001 (1,413;2,711) | 1,184 (672;1,752) | 929 (640;1,287) | 720 (430;1,084) | a,b,c,d,e,f |

Data are unadjusted medians (interquartile range). *P* values are adjusted for age, gender, risk/intervention group, family history of diabetes, and baseline values of BMI, smoking, physical activity, and dietary quality. a) i-IFG vs. NGT, b) i-IGT vs. NGT, c) IFG/IGT vs. NGT, d) i-IGT vs. i-IFG, e) IFG/IGT vs. i-IFG, f) IFG/IGT vs. i-IGT.
